# Supplementary material for: Assessment of the Health Status of Spanish Schoolchildren Based on Nutrimetry, Lifestyle and Intestinal Parasites
Source: MDPI journal article supplement (doi:10.3390/nu15122801), 2023-06-19
Supplement: s1 [file s1]

**Table S1.** Socioeconomic and socio-demographic characteristics of the municipalities of the two participating public schools.

| Variable                                                 | Municipality        |                     | Reference |
|----------------------------------------------------------|---------------------|---------------------|-----------|
|                                                          | Paterna (La Cañada) | Vila-Real           |           |
| Country                                                  | Spain               | Spain               | [41,42]   |
| Autonomous community                                     | Valencian Community | Valencian Community |           |
| Province                                                 | Valencia            | Castellón           |           |
| Population in relation to the community (%)              | 1.41                | 1.01                |           |
| Children under 16 years (%)                              | 19.27               | 16.69               |           |
| Older than 64 years (%)                                  | 14.68               | 17.05               |           |
| Illiterate and not educated (%)                          | 8.24                | 10.79               |           |
| Foreigners (number of people)                            | 7314                | 6791                |           |
| Activity rate (%)                                        | 71.72               | 65.66               |           |
| Average budget per inhabitant (euros/inhabitant)         | 891.69              | 1052.07             |           |
| Telephone lines (no. telephone lines x 100 inhabitants)  | 45.30               | 37.44               |           |
| Passenger cars (no. of passenger cars x 100 inhabitants) | 51.80               | 52.51               |           |
| Average cadastral value (euros)                          | 81,585.32           | 76,623.49           |           |
| Total number of enterprises                              | 5969                | 3277                |           |
| Surface area of the municipality (hectares)              | 3585                | 5512                |           |
| Urban Area (hectares)                                    | 1211.39             | 1183.23             |           |

**Table S2.** English version of the standardised epidemiological questionnaire used in this study.

| Variable                                             | Category and State Code                  |
|------------------------------------------------------|------------------------------------------|
| School sample                                        | String variable (free text)              |
| Sampling kit ID                                      | String variable (free text)              |
| Sampling date                                        | Date variable                            |
| Country of birth                                     | Sampling date                            |
| Place of residence                                   | Sampling date                            |
| Weight                                               | Decimal variable (number in kilograms)   |
| Height                                               | Decimal variable (number in centimetres) |
| Sex                                                  | Girl (1)<br>Boy (2)                      |
| Age                                                  | Integer variable (number)                |
| Number of relatives residing at home                 | Integer variable (number)                |
| Source of drinking water                             | Bottled (1)<br>Tap (2)<br>Osmosis (3)    |
| Hand and fruit/vegetable washing                     | Yes (1)<br>No (2)                        |
| Contact with domestic animals                        | Yes (1)<br>No (2)                        |
| Playing outdoors                                     | Yes (1)<br>No (2)                        |
| Get at least one hour of physical activity every day | Yes (1)<br>No (2)                        |
| Screen time is less than two hours per day           | Yes (1)<br>No (2)                        |

KidMed Questionnaire [16]:

| Adherence to the MEDITERRANEAN DIET in childhood                      | yes/no |
|-----------------------------------------------------------------------|--------|
| Have a piece of fruit or natural juice every day.                     |        |
| Have a 2nd piece of fruit every day.                                  |        |
| Eat fresh (salads) or cooked vegetables regularly once +1 time a day. |        |
| Eat fresh or cooked vegetables regularly more than +1 time per day.   |        |
| Eat fish regularly (at least 2-3 times a +1 week).                    |        |
| Goes once or more per week to a fast food centre (hamburger joint).   |        |
| Likes pulses and eats them more than once a week.                     |        |
| Eats pasta or rice almost every day (5 days or more per week).        |        |
| Eats a cereal or derivative (bread, etc.) for breakfast.              |        |
| Eats nuts and dried fruit regularly (at least 2-3 times a week).      |        |
| Olive oil is used at home.                                            |        |
| No breakfast.                                                         |        |

|                                                           |  |
|-----------------------------------------------------------|--|
| Have a dairy product for breakfast (yoghurt, milk, etc.). |  |
| Eat industrial pastries, biscuits or cakes for breakfast. |  |
| Eat 2 yoghurts and/or 40 g cheese every day.              |  |
| Eat sweets and/or candies several times a day.            |  |

FFQ (the original Spanish version is provided) [45]:

Indicate with an X which corresponds to the consumption of the foods listed for the child:

|                                      | 7                | 6                | 5                  | 4                  | 3                  | 2                    | 1                     | 0            |
|--------------------------------------|------------------|------------------|--------------------|--------------------|--------------------|----------------------|-----------------------|--------------|
| <b>I. LÁCTEOS</b>                    | <b>Más 1/día</b> | <b>1 vez/día</b> | <b>5-6/ semana</b> | <b>3-4/ semana</b> | <b>1-2/ semana</b> | <b>&lt; 1/semana</b> | <b>&lt; 1 vez/mes</b> | <b>Nunca</b> |
| Leche entera (1 vaso/taza)           |                  |                  |                    |                    |                    |                      |                       |              |
| Leche semi o descremada (1 vaso)     |                  |                  |                    |                    |                    |                      |                       |              |
| Leche condensada (1 cucharada)       |                  |                  |                    |                    |                    |                      |                       |              |
| Café con leche (1 vaso)              |                  |                  |                    |                    |                    |                      |                       |              |
| Café cortado con leche               |                  |                  |                    |                    |                    |                      |                       |              |
| Yogur entero (1=125g)                |                  |                  |                    |                    |                    |                      |                       |              |
| Yogur semi o desnatado (1=125g)      |                  |                  |                    |                    |                    |                      |                       |              |
| Requesón/cuajada/queso fresco (100g) |                  |                  |                    |                    |                    |                      |                       |              |
| Queso cremoso/porciones (50g)        |                  |                  |                    |                    |                    |                      |                       |              |
| Queso curado tipo manchego (50g)     |                  |                  |                    |                    |                    |                      |                       |              |
| Fian (uno)                           |                  |                  |                    |                    |                    |                      |                       |              |
| Natillas o similares (uno)           |                  |                  |                    |                    |                    |                      |                       |              |
| Horchata (1 vaso)                    |                  |                  |                    |                    |                    |                      |                       |              |
| Batido de soja (1 vaso)              |                  |                  |                    |                    |                    |                      |                       |              |

  

|                                             | 7                | 6                | 5                  | 4                  | 3                  | 2                    | 1                     | 0            |
|---------------------------------------------|------------------|------------------|--------------------|--------------------|--------------------|----------------------|-----------------------|--------------|
| <b>II. DULCES Y BOLLERÍA</b>                | <b>Más 1/día</b> | <b>1 vez/día</b> | <b>5-6/ semana</b> | <b>3-4/ semana</b> | <b>1-2/ semana</b> | <b>&lt; 1/semana</b> | <b>&lt; 1 vez/mes</b> | <b>Nunca</b> |
| Galletas tipo María (1 galleta)             |                  |                  |                    |                    |                    |                      |                       |              |
| Galletas de chocolate (1 galleta)           |                  |                  |                    |                    |                    |                      |                       |              |
| Ensamada/croissant (uno)                    |                  |                  |                    |                    |                    |                      |                       |              |
| Donuts (uno)                                |                  |                  |                    |                    |                    |                      |                       |              |
| Magdalenas/bizcochos (uno)                  |                  |                  |                    |                    |                    |                      |                       |              |
| Tartas/pastelillos (1 ración)               |                  |                  |                    |                    |                    |                      |                       |              |
| Chocolate con leche (1 trozo)               |                  |                  |                    |                    |                    |                      |                       |              |
| Chocolate puro (1 trozo)                    |                  |                  |                    |                    |                    |                      |                       |              |
| Chocolate en polvo (una cucharada desayuno) |                  |                  |                    |                    |                    |                      |                       |              |

  

|                                 | 7                | 6                | 5                  | 4                  | 3                  | 2                    | 1                     | 0            |
|---------------------------------|------------------|------------------|--------------------|--------------------|--------------------|----------------------|-----------------------|--------------|
| <b>III. PAN Y CEREALES</b>      | <b>Más 1/día</b> | <b>1 vez/día</b> | <b>5-6/ semana</b> | <b>3-4/ semana</b> | <b>1-2/ semana</b> | <b>&lt; 1/semana</b> | <b>&lt; 1 vez/mes</b> | <b>Nunca</b> |
| Pan blanco (media barra. 125g)  |                  |                  |                    |                    |                    |                      |                       |              |
| Pan integral (media barra 125g) |                  |                  |                    |                    |                    |                      |                       |              |
| Pan de molde (1 rebanada)       |                  |                  |                    |                    |                    |                      |                       |              |
| Rosquilletas (3-4 unidades)     |                  |                  |                    |                    |                    |                      |                       |              |
| Macarrones/espagueti (1 plato)  |                  |                  |                    |                    |                    |                      |                       |              |
| Paella (1 plato)                |                  |                  |                    |                    |                    |                      |                       |              |
| Arroz, no paella (1 plato)      |                  |                  |                    |                    |                    |                      |                       |              |
| Sopa fideos/letras (1 plato)    |                  |                  |                    |                    |                    |                      |                       |              |

|                                              | 7         | 6         | 5           | 4           | 3           | 2          | 1           | 0     |
|----------------------------------------------|-----------|-----------|-------------|-------------|-------------|------------|-------------|-------|
| <b>IV. HUEVOS, CARNES, PESCADOS</b>          | Más 1/día | 1 vez/día | 5-6/ semana | 3-4/ semana | 1-2/ semana | < 1/semana | < 1 vez/mes | Nunca |
| Un huevo hervido                             |           |           |             |             |             |            |             |       |
| Un huevo frito                               |           |           |             |             |             |            |             |       |
| Un huevo en tortilla                         |           |           |             |             |             |            |             |       |
| Una ración pollo plancha                     |           |           |             |             |             |            |             |       |
| Una ración pollo frito                       |           |           |             |             |             |            |             |       |
| Un filete ternera plancha                    |           |           |             |             |             |            |             |       |
| Un filete ternera frito o guisado            |           |           |             |             |             |            |             |       |
| Carne de cordero                             |           |           |             |             |             |            |             |       |
| Una ración carne cerdo (lomo, solomillo...)  |           |           |             |             |             |            |             |       |
| Una ración carne de conejo (130 g)           |           |           |             |             |             |            |             |       |
| Una ración hígado de cordero, cerdo, ternera |           |           |             |             |             |            |             |       |
| Una ración de vísceras (callos, sesos...)    |           |           |             |             |             |            |             |       |
| Una hamburguesa de pollo/pavo                |           |           |             |             |             |            |             |       |
| Una hamburguesa ternera                      |           |           |             |             |             |            |             |       |
| Una loncha de jamón serrano (25 g)           |           |           |             |             |             |            |             |       |
| Una loncha de jamón de york (25 g)           |           |           |             |             |             |            |             |       |
| Una ración de salchichón o chorizo           |           |           |             |             |             |            |             |       |
| Una salchicha/longaniza fresca               |           |           |             |             |             |            |             |       |
| Una morcilla                                 |           |           |             |             |             |            |             |       |
| Una ración de tocino,/bacon                  |           |           |             |             |             |            |             |       |
| Foie-gras o patés (una ración)               |           |           |             |             |             |            |             |       |
| Calamares/sepia a la romana (1 ración)       |           |           |             |             |             |            |             |       |
| Un plato de pescado frito                    |           |           |             |             |             |            |             |       |
| Un plato de pescado plancha o hervido        |           |           |             |             |             |            |             |       |
| Una lata de atún en conserva                 |           |           |             |             |             |            |             |       |
| Una lata de sardinas en conserva             |           |           |             |             |             |            |             |       |
| Pescados en salazón o conserva               |           |           |             |             |             |            |             |       |
| Una ración de almejas o mejillones           |           |           |             |             |             |            |             |       |
| Una ración de marisco (gambas, cigalas...)   |           |           |             |             |             |            |             |       |

|                                         | 7         | 6         | 5           | 4           | 3           | 2          | 1           | 0     |
|-----------------------------------------|-----------|-----------|-------------|-------------|-------------|------------|-------------|-------|
| <b>V. VERDURAS Y PATATAS</b>            | Más 1/día | 1 vez/día | 5-6/ semana | 3-4/ semana | 1-2/ semana | < 1/semana | < 1 vez/mes | Nunca |
| Lechuga/escarola en ensalada (125g)     |           |           |             |             |             |            |             |       |
| Un tomate solo o ensalada               |           |           |             |             |             |            |             |       |
| Zanahorias en ensalada                  |           |           |             |             |             |            |             |       |
| Un plato de zanahorias guisadas         |           |           |             |             |             |            |             |       |
| Una cebolla en ensalada o asada         |           |           |             |             |             |            |             |       |
| Una patata hervida o asada              |           |           |             |             |             |            |             |       |
| Una ración de patatas fritas            |           |           |             |             |             |            |             |       |
| Una berenjena                           |           |           |             |             |             |            |             |       |
| Un calabacín                            |           |           |             |             |             |            |             |       |
| Un pimiento                             |           |           |             |             |             |            |             |       |
| Plato de alcachofas/espinacas/aceitunas |           |           |             |             |             |            |             |       |
| Un plato de judías verdes               |           |           |             |             |             |            |             |       |
| Una ración de espárragos                |           |           |             |             |             |            |             |       |
| Una ración de setas o champiñones       |           |           |             |             |             |            |             |       |
| Un plato de guisantes cocinados         |           |           |             |             |             |            |             |       |
| Col, coliflor o brécoles                |           |           |             |             |             |            |             |       |
| Un pepino                               |           |           |             |             |             |            |             |       |

|                            | 7         | 6         | 5           | 4           | 3           | 2          | 1           | 0     |
|----------------------------|-----------|-----------|-------------|-------------|-------------|------------|-------------|-------|
| <b>VI. LEGUMBRES</b>       | Más 1/día | 1 vez/día | 5-6/ semana | 3-4/ semana | 1-2/ semana | < 1/semana | < 1 vez/mes | Nunca |
| Un plato de lentejas       |           |           |             |             |             |            |             |       |
| Un plato de garbanzos      |           |           |             |             |             |            |             |       |
| Un plato de judías blancas |           |           |             |             |             |            |             |       |

|                                     | 7         | 6         | 5           | 4           | 3           | 2          | 1           | 0     |
|-------------------------------------|-----------|-----------|-------------|-------------|-------------|------------|-------------|-------|
| <b>VII. FRUTAS Y FRUTOS SECOS</b>   | Más 1/día | 1 vez/día | 5-6/ semana | 3-4/ semana | 1-2/ semana | < 1/semana | < 1 vez/mes | Nunca |
| Una naranja o mandarina             |           |           |             |             |             |            |             |       |
| Un plátano                          |           |           |             |             |             |            |             |       |
| Una manzana                         |           |           |             |             |             |            |             |       |
| Una pera                            |           |           |             |             |             |            |             |       |
| Un melocotón o similares            |           |           |             |             |             |            |             |       |
| Una ración de fresas                |           |           |             |             |             |            |             |       |
| Una ración de cerezas               |           |           |             |             |             |            |             |       |
| Un Kiwi                             |           |           |             |             |             |            |             |       |
| Sandía o melón (1 tajada)           |           |           |             |             |             |            |             |       |
| Una ración de piña natural          |           |           |             |             |             |            |             |       |
| Melocotón o piña en almibar         |           |           |             |             |             |            |             |       |
| Una ración de aceitunas             |           |           |             |             |             |            |             |       |
| Una ración de almendras o avellanas |           |           |             |             |             |            |             |       |
| Una ración de cacahuetes            |           |           |             |             |             |            |             |       |
| Una ración de nueces                |           |           |             |             |             |            |             |       |

|                                            | 7         | 6         | 5           | 4           | 3           | 2          | 1           | 0     |
|--------------------------------------------|-----------|-----------|-------------|-------------|-------------|------------|-------------|-------|
| <b>VIII. ACEITES Y GRASAS</b>              | Más 1/día | 1 vez/día | 5-6/ semana | 3-4/ semana | 1-2/ semana | < 1/semana | < 1 vez/mes | Nunca |
| Aceite de oliva virgen extra (1 cucharada) |           |           |             |             |             |            |             |       |
| Aceite de oliva refinado (1 cucharada)     |           |           |             |             |             |            |             |       |
| Aceites de girasol (1 cucharada)           |           |           |             |             |             |            |             |       |
| Aceite maíz (1 cucharada)                  |           |           |             |             |             |            |             |       |
| Otros aceites vegetales (1 cucharada)      |           |           |             |             |             |            |             |       |
| Mantequilla (1 cucharada o untada)         |           |           |             |             |             |            |             |       |
| Margarina (1 cucharada o untada)           |           |           |             |             |             |            |             |       |
| Manteca de cerdo (1 cucharada/untada)      |           |           |             |             |             |            |             |       |
|                                            | 7         | 6         | 5           | 4           | 3           | 2          | 1           | 0     |
| <b>IX. BEBIDAS Y REFRESCOS</b>             | Más 1/día | 1 vez/día | 5-6/ semana | 3-4/ semana | 1-2/ semana | < 1/semana | < 1 vez/mes | Nunca |
| Un vaso de zumo de naranja natural         |           |           |             |             |             |            |             |       |
| Un vaso de zumo de frutas envasado         |           |           |             |             |             |            |             |       |
| Un vaso de coca-cola                       |           |           |             |             |             |            |             |       |
| Un vaso de gaseosa/fanta                   |           |           |             |             |             |            |             |       |
| Un vaso de tónica o bitter                 |           |           |             |             |             |            |             |       |
| Un vaso de vino blanco                     |           |           |             |             |             |            |             |       |
| Un vaso de vino tinto o rosado             |           |           |             |             |             |            |             |       |
| Cerveza (1 caña)                           |           |           |             |             |             |            |             |       |
| Café solo sin azúcar (1 taza)              |           |           |             |             |             |            |             |       |
| Café con azúcar/edulcorante (1 taza)       |           |           |             |             |             |            |             |       |
| Té u otras infusiones sin azúcar           |           |           |             |             |             |            |             |       |
| Té u otras infusiones con azúcar           |           |           |             |             |             |            |             |       |
|                                            | 7         | 6         | 5           | 4           | 3           | 2          | 1           | 0     |
| <b>X. OTROS ALIMENTOS</b>                  | Más 1/día | 1 vez/día | 5-6/ semana | 3-4/ semana | 1-2/ semana | < 1/semana | < 1 vez/mes | Nunca |
| Sopas y cremas de sobre (1 plato)          |           |           |             |             |             |            |             |       |
| Palitos o delicias de pescado (1)          |           |           |             |             |             |            |             |       |
| Croquetas (1)                              |           |           |             |             |             |            |             |       |
| Palomitas de maíz (1 paquete)              |           |           |             |             |             |            |             |       |
| Una bolsa de pipas de girasol              |           |           |             |             |             |            |             |       |
| Mayonesa (1 cucharada)                     |           |           |             |             |             |            |             |       |
| Salsa de tomate (1 cucharada)              |           |           |             |             |             |            |             |       |
| Pizza                                      |           |           |             |             |             |            |             |       |
| Sal (una pizca a la comida)                |           |           |             |             |             |            |             |       |
| Azúcar añadido (1 cucharada)               |           |           |             |             |             |            |             |       |
| Mermelada/miel (1 cucharada)               |           |           |             |             |             |            |             |       |

**Table S3.** Oligonucleotides used for the molecular identification and/or characterization of the intestinal protists parasites investigated in the present study.

| Target organism                | Locus              | Oligonucleotide | Sequence (5'–3')                  | Reference |
|--------------------------------|--------------------|-----------------|-----------------------------------|-----------|
| <i>Giardia duodenalis</i>      | <i>ssu</i><br>rRNA | Probe           | FAM–CCCGCGGCGGTCCCTGCTAG–<br>BHQ1 | [46]      |
|                                |                    | Gd-80F          | GACGGCTCAGGACAACGGTT              | [46]      |
|                                |                    | Gd-127R         | TTGCCAGCGGTGTCCG                  | [46]      |
| <i>Blastocystis</i> sp.        | <i>ssu</i><br>rRNA | BhRDr           | GAGCTTTTAACTGCAACAACG             | [48]      |
|                                |                    | RD5             | ATCTGGTTGATCCTGCCAGT              | [48]      |
| <i>Cryptosporidium</i><br>spp. | <i>ssu</i><br>rRNA | CR-P1           | CAGGGAGGTAGTGACAAGAA              | [48]      |
|                                |                    | CR-P2           | TCAGCCTTGCGACCATACTC              | [49]      |
|                                |                    | CR-P3           | ATTGGAGGGCAAGTCTGGTG              | [49]      |
|                                |                    | CPB-<br>DIAGR   | TAAGGTGCTGAAGGAGTAAGG             | [49]      |

*ssu* rRNA: Small subunit ribosomal RNA.
